# Supplementary material
Source: publisher figshare collection journal article supplement (https://plos.figshare.com/articles/dataset/_/3190378)
Supplement: Supplementary file [file 1]

**Table A-I: Summary Statistics**

| <i>Variables</i>                                     | <i>Domain</i>                                                 | <i>Survey A</i> |                           | <i>Survey B</i> |                           |
|------------------------------------------------------|---------------------------------------------------------------|-----------------|---------------------------|-----------------|---------------------------|
|                                                      |                                                               | <i>mean</i>     | <i>standard deviation</i> | <i>mean</i>     | <i>standard deviation</i> |
| Awareness                                            | 0 (have never heard);<br>1 (have heard at least a little bit) | 0.19            | 0.39                      | 0.23            | 0.42                      |
| Acceptance                                           | 1 (strongly disagree) – 4 (strongly agree)                    | 2.09            | 0.93                      | 2.07            | 0.91                      |
| Risk perception                                      | 1 (very small) – 4 (very large)                               | 3.23            | 0.74                      | 3.29            | 0.74                      |
| Benefit perception                                   | 1 (very small) – 4 (very large)                               | 2.45            | 0.78                      | 2.43            | 0.77                      |
| Emotions (negative)*                                 | 1 (not at all) – 4 (strongly)                                 | 0.002           | 0.81                      | 0.002           | 0.81                      |
| Emotions (positive)*                                 | 1 (not at all) – 4 (strongly)                                 | -0.007          | 0.88                      | 0.003           | 0.91                      |
| Gender                                               | 0 (male); 1 (female)                                          | 47%             |                           | 51%             |                           |
| High education                                       | 0 (other); 1 (A level)                                        | 34%             |                           | 34%             |                           |
| Income (monthly household income in €, net of taxes) | 250 – 10,000                                                  | 2400.47         | 1565.56                   | 2483.25         | 1478.38                   |
| Age                                                  | 18 – 87                                                       | 47              | 15.42                     | 46              | 15.21                     |
| N                                                    |                                                               | 776             |                           | 663             |                           |

Note: \* Mean values for emotions are averages of standardised items (mean = 0, standard deviation = 1). Items for negative emotions include worry, fear, sadness, anger, annoyance. Items for positive emotion encompass delight, satisfaction, hopefulness, relief.
